RETRACTION

# Retraction: Chaperonin CCT-Mediated AIB1 Folding Promotes the Growth of ER $\alpha$ -Positive Breast Cancer Cells on Hard Substrates

The *PLOS ONE* Editors

After this article [1] was published, concerns were raised about similarities between the TCP-1  $\epsilon$  blot shown in Figure 4A and the CCT $\eta$  blot for the Input samples in Figure 5A. The corresponding author, Dr. Luo, confirmed there was an error in image processing and requested retraction. The original data underlying the figure panels in question and other figures in the published article are no longer available.

In light of the concerns about Figures 4A and 5A and the unavailability of the underlying data, the *PLOS ONE* Editors retract this article.

The authors did not comment on the retraction decision.

## Reference

1. Chen L, Zhang Z, Qiu J, Zhang L, Luo X, Jang J (2014) Chaperonin CCT-Mediated AIB1 Folding Promotes the Growth of ER $\alpha$ -Positive Breast Cancer Cells on Hard Substrates. *PLoS ONE* 9(5): e96085. <https://doi.org/10.1371/journal.pone.0096085> PMID: 24788909

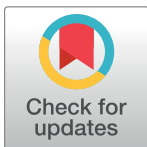

## OPEN ACCESS

**Citation:** The *PLOS ONE* Editors (2018) Retraction: Chaperonin CCT-Mediated AIB1 Folding Promotes the Growth of ER $\alpha$ -Positive Breast Cancer Cells on Hard Substrates. *PLoS ONE* 13(8): e0202617. <https://doi.org/10.1371/journal.pone.0202617>

**Published:** August 15, 2018

**Copyright:** © 2018 The PLOS ONE Editors. This is an open access article distributed under the terms of the [Creative Commons Attribution License](https://creativecommons.org/licenses/by/4.0/), which permits unrestricted use, distribution, and reproduction in any medium, provided the original author and source are credited.
